# Supplementary material for: A hierarchical NiCo2O4spinel nanowire array as an electrocatalyst for rechargeable Li–air batteries
Source: Royal Society of Chemistry journal article supplement (doi:10.1039/c4ra06300g), 2014-08-26
Supplement: c4ra06300g1.pdf [file c4ra06300g1.pdf]

## Electronic Supplementary Information

### A hierarchical $\text{NiCo}_2\text{O}_4$ spinel nanowire arrays as electrocatalysts for rechargeable Li–air batteries

Fanliang Lu,<sup>§a</sup> Xuecheng Cao,<sup>§a</sup> Yarong Wang,<sup>a</sup> Chao Jin,<sup>\*a</sup> Ming Shen,<sup>b</sup> Ruizhi Yang<sup>\*a</sup>

<sup>a</sup> College of Physics, Optoelectronics and Energy & Collaborative Innovation Center of Suzhou Nano Science and Technology, Soochow University, Suzhou 215006, China.

Corresponding authors: *Tel:* +86 512 67875503; *E-mail:* [jinchao@suda.edu.cn](mailto:jinchao@suda.edu.cn) (C. Jin); [yangrz@suda.edu.cn](mailto:yangrz@suda.edu.cn) (R.Z. Yang)

<sup>b</sup> Huasheng Chemical Corporation, Zhangjiagang 215635, China

<sup>§</sup>These authors contributed equally to this work.

## Experimental

### Preparation of hierarchical NiCo<sub>2</sub>O<sub>4</sub> nanowire arrays (H-NCO-NWA)

Hierarchical NiCo<sub>2</sub>O<sub>4</sub> spinel nanowire arrays (H-NCO-NWA) were prepared by a modified template-free co-precipitation route. Firstly, urea was dissolved in 300 ml deionized water with constant stirring and heated to 80 °C on a hot-plate; Secondly, stoichiometric amounts of Co(NO<sub>3</sub>)<sub>2</sub>·6H<sub>2</sub>O and Ni(NO<sub>3</sub>)<sub>2</sub>·6H<sub>2</sub>O were dissolved in 200 ml deionized water to obtain a mixed solution, the concentration of total metal ions was 0.06 mol L<sup>-1</sup>, and the mole ratio of the total metal ions : urea was controlled to be 1 : 20. Thirdly, the mixed solution was added to the urea solution drop by drop through a back titration method. After finishing the drop, precipitates were formed with stirring for 0.5 h, followed by an ageing over 24 h at 80 °C to allow the growth of nanowire arrays. The precipitates were filtered and washed several times with deionized water and ethanol, and then dried in an oven at 60 °C for 12h to form a NCO spinel precursor powder. At last, the as-obtained precursor powder was calcined at 400 °C for 4 h in air.

### Material characterization

The crystal structure of the oxide was determined by X-ray diffraction (XRD, Cu K<sub>α</sub> radiation;  $\lambda = 0.15418$  nm) with a Bede D1 X-ray diffractometer. Brunauer-Emmett-Teller (BET) specific surface areas were determined from nitrogen sorption isotherms that were performed on BEL-SORPmini system (BEL Japan). The morphology and microstructure of the synthesized sample were characterized by a scanning electron microscopy (SEM, Hitachi SU8010) and a transmission electron microscope (TEM; TecnaiG220 operating at 200 kV). The cathodes were also observed on Hitachi SU8010 scanning electron microscope.

### Electrochemical measurements

The electrochemical properties were carried out by assembling 2032 coin Li-air batteries in a glove box filled with pure argon gas (< 1 ppm H<sub>2</sub>O and O<sub>2</sub>), using a clean lithium pellet anode, a glass fibre separator, an electrolyte containing 1 M LiTFSI in TEGDME, an oxygen cathode. The oxygen cathodes were prepared by spraying homogenous ink composed of the mixture of 15 wt.% H-NCO-NWA, 75 wt.%

acetylene black and 10 wt.% polyvinylidene fluoride (PVDF) onto the a nickel foam current collector. 0.5 mg activity materials (C+catalyst) were loaded on nickel foam ( $\Phi$  12 mm). The galvanostatic discharge-charge tests were conducted within a voltage window of 2.0-4.5 V (vs.  $\text{Li/Li}^+$ ) with a multichannel battery testing system (LAND CT 2001A) in a testing glove box filled with a dry gas mixture composed of 80 vol.% pure  $\text{N}_2$  (99.999 %) and 20 vol.% pure  $\text{O}_2$  (99.999 %). The capacity was calculated based on the mass of carbon and electrocatalyst (C+catalyst). Cyclic voltammetry (CV) experiments were carried out with CHI 604B electrochemical workstation from 4.5 to 2.0 V at a scan rate  $0.2 \text{ mV s}^{-1}$ .

For comparison, a regular  $\text{NiCo}_2\text{O}_4$  powder was synthesized through a sol-gel process.<sup>1</sup> Li-air batteries with pure acetylene black and regular  $\text{NiCo}_2\text{O}_4$  as cathode catalyst were assembled and tested with the same procedure, respectively.

## Results and discussion:

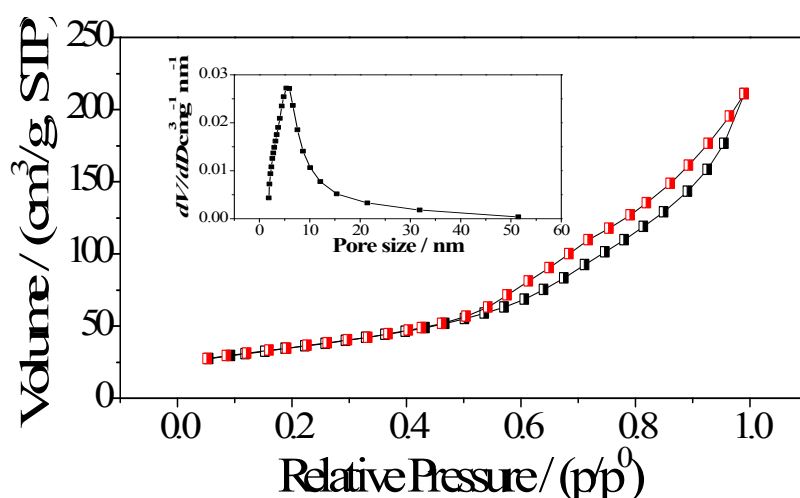

Fig. S1,  $\text{N}_2$  adsorption-desorption isotherm loop and pore distribution plot (inset) of H-NCO-NWA.

The  $\text{N}_2$ -adsorption isotherm and the pore-size distribution are shown in Fig. S1. The  $\text{N}_2$ -adsorption isotherm of the H-NCO-NWA exhibited the combined characteristics of type IV, with a surface area of  $124 \text{ m}^2 \text{ g}^{-1}$  and a total pore volume of  $10.32 \text{ cm}^3 \text{ g}^{-1}$ . The hysteresis loop in the  $P/P_0$  range of 0.5–1.0 is indicative of mesoporosity. From the pore-size distribution, it was clearly observed that there were main mesopores with a wide size range of about 8 nm, in agreement with the TEM

results.

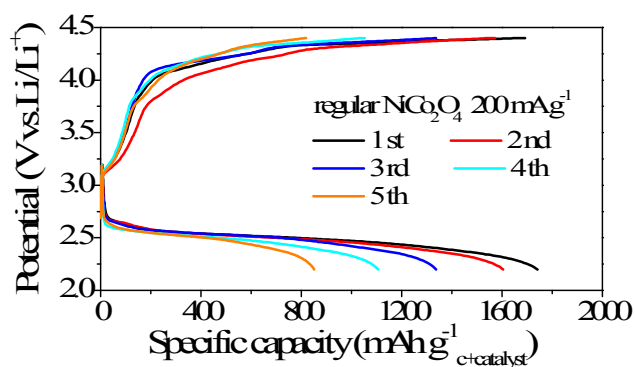

Fig. S2, Typical fully discharged and charged profiles of a Li-air battery based on regular  $\text{NiCo}_2\text{O}_4$  electrode at a discharge-charge current density of  $200 \text{ mA g}^{-1}$ .

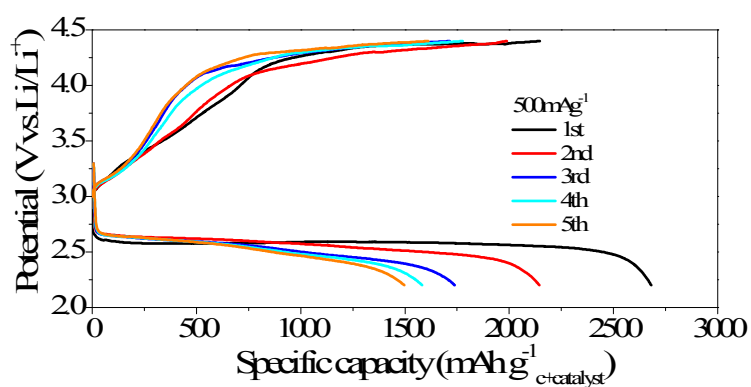

Fig. S3, Profiles of a Li-air battery using the H-NCO-NWA-based electrode under different discharge-charge cycles at a deep discharge-charge current density of  $500 \text{ mA g}^{-1}$ .

Table S1, Comparison of BET results between the H-NCO-NWA and other reported NiCo<sub>2</sub>O<sub>4</sub> materials

|                         | Specific surface area<br>(cm <sup>3</sup> /g, STP) | Pore size<br>(nm) | References |
|-------------------------|----------------------------------------------------|-------------------|------------|
| NCO nanoplatelet @ GO   | 77                                                 | 11.8              | 2          |
| NCO nanosheets          | 89                                                 |                   | 3          |
| NCO @ stainless steel   | 119                                                | 6                 | 4          |
| NCO chain-like nanowire | 42                                                 | 10.4              | 5          |
| NCO hollow nanocube     | 82                                                 | 3                 | 6          |
| Flower-like NCO         | 80                                                 | 8                 | 7          |
| NCO nanowire arrays     | 124                                                | 8                 | this work  |

## References

1. Y. Q. Wu, X. Y. Chen, P. T. Ji and Q. Q. Zhou, *Electrochim. Acta*, 2011, 56, 7517.
2. D. U. Lee, B. J. Kim, Z. W. Chen, *J. Mater. Chem. A*, 2013, 1, 4754.
3. X. H. Lu, X. Huang, S. L. Xie, T. Zhai, C. S. Wang, P. Zhang, M. H. Yu, C. L. Liang and Y. X. Tong, *J. Mater. Chem.*, 2012, 22, 13357.
4. L. Qian, L. Gu, L. Yang, H. Y. Yuan and D. Xiao, *Nanoscale*, 2013, 5, 7388
5. R. J. Zou, K. B. Xu, T. Wang, G. J. He, Q. Liu, X. J. Liu, Z. Y. Zhang and J. Q. Hu *J. Mater. Chem. A*, 2013, 1, 8560
6. H. Guo, L. X. Liu, T. T. Li, W. W. Chen, J. J. Liu, Y. Y. Guo and Y. C. Guo, *Nanoscale*, 2014, 6, 5491
7. L. L. Li, Y. L. Cheah, Y. Ko, P. Teh, G. Wee, Ch. Wong, S. J. Peng and M. Srinivasan, *J. Mater. Chem. A*, 2013, 1, 10935
